# Supplementary material for: Microwave-assisted solvothermal synthesis of zirconium oxide based metal–organic frameworks
Source: Royal Society of Chemistry journal article supplement (doi:10.1039/c3cc40368h), 2013-01-01
Supplement: c3cc40368h.pdf [file c3cc40368h.pdf]

## Supplementary Information for

# Microwave-Assisted Solvothermal Synthesis of Zirconium Oxide Based Metal-Organic Frameworks

Weibin Liang and Deanna M. D'Alessandro\*

School of Chemistry, The University of Sydney, New South Wales 2006, Australia

### EXPERIMENTAL SECTION

#### *Syntheses*

**Microwave Heating:** Microwave syntheses of MIL-140A-MW, MIL-140B-MW and MIL-140A-NH<sub>2</sub>-MW were conducted using an Anton Paar Monowave 300 microwave oven. A 30 mL glass microwave vial was charged with 0.25 mmol ZrCl<sub>4</sub> (> 99.9%, Sigma-Aldrich) and 0.5 mmol 1,4-benzenedicarboxylic acid (H<sub>2</sub>bdc, 98%, Sigma-Aldrich), 2,6-naphthalenedicarboxylic acid (H<sub>2</sub>ndc, 99%, Sigma-Aldrich) or 2-amino-1,4-benzenedicarboxylic acid (H<sub>2</sub>abdc, 99%, Sigma-Aldrich). Thereafter, 0.04 mL (0.7 mmol) of acetic acid and 2.5 mL of *N,N'*-dimethylformamide (DMF) were introduced. The mixture was heated with magnetic stirring to 220 °C within 2 min, and held at this temperature for 15 min before cooling to 55 °C within 2 min. The precipitates were vacuum filtered, and repeatedly washed with DMF and acetone. The materials were subsequently solvent exchanged with methanol using a Soxhlet washing procedure for 12 h. The resulting powder was dried in air. Elemental analysis calculated for the newly synthesised framework MIL-140A-NH<sub>2</sub>-MW ([ZrO(O<sub>2</sub>C-C<sub>6</sub>H<sub>5</sub>N-CO<sub>2</sub>)]): C, 33.54; H, 1.75; N, 4.90 %; experimental: C, 32.16; H, 1.95; N, 4.16 %.

**Conventional Electric Heating.** MIL-140A-CE, MIL-140B-CE and MIL-140A-NH<sub>2</sub>-CE were synthesised solvothermally using similar methods to those reported by Serre and coworkers.<sup>1</sup> Typically, in a 25 mL Teflon-lined steel Parr bomb, 0.5 mmol of H<sub>2</sub>bdc, H<sub>2</sub>ndc or H<sub>2</sub>abdc and 0.25 mmol of ZrCl<sub>4</sub> were dissolved in 2.5 mL of DMF. To this solution, 0.04 mL (0.7 mmol) of acetic acid was added (the synthesis of MIL-140A-NH<sub>2</sub>-CE was attempted using three different amounts of acetic acid, namely, 0.04, 0.16 and 0.54 mL). The reaction vessel was sealed and placed in a pre-heated oven at 220 °C for a period of 16 h for MIL-140A-CE, 6 h for MIL-140B-CE, and both 12 and 24 h for MIL-140A-NH<sub>2</sub>-CE. The Parr bombs were subsequently cooled to room temperature in the oven within 8 h before the precipitates were isolated by vacuum filtration and washed with DMF and acetone. The materials were subsequently solvent exchanged with methanol using a Soxhlet washing procedure for 12 h. The resulting powder was dried in air.

A summary of the reaction conditions is provided in Tables S1 and S2.

**Table S1** Synthesis conditions for the frameworks using microwave heating (MW) and conventional electric heating (CE)

| Phase <sup>a</sup>           | ZrCl <sub>4</sub> <sup>2</sup> | Ligand <sup>2</sup> | DMF [mL] | Acetic acid [mL] | Heating method <sup>b</sup> | T [°C] | Time [min] | Yield [%] <sup>c</sup> |
|------------------------------|--------------------------------|---------------------|----------|------------------|-----------------------------|--------|------------|------------------------|
| MIL-140A-MW                  | 0.25                           | 0.5                 | 2.5      | 0.04             | MW                          | 220    | 15         | 91.0                   |
| MIL-140A-CE                  | 0.25                           | 0.5                 | 2.5      | 0.04             | CE                          | 220    | 960        | 88.9                   |
| MIL-140B-MW                  | 0.25                           | 0.5                 | 2.5      | 0.04             | MW                          | 220    | 15         | 90.3                   |
| MIL-140B-CE                  | 0.25                           | 0.5                 | 2.5      | 0.04             | CE                          | 220    | 360        | 90.0                   |
| MIL-140A-NH <sub>2</sub> -MW | 0.25                           | 0.5                 | 2.5      | 0.04             | MW                          | 220    | 15         | 96.1                   |

<sup>a</sup> bdc: 1,4-benzenedicarboxylic acid, ndc: 2,6-naphthalenedicarboxylic acid, abdc:

2-amino-1,4-benzenedicarboxylic acid; <sup>b</sup> MW: microwave heating, temperature ramp to 220 °C within 2 min; CE: conventional electric heating, syntheses in a pre-heated oven at 220 °C; <sup>c</sup> based on zirconium.

**Table S2** Attempted synthesis conditions for MIL-140A-NH<sub>2</sub> using conventional electric heating (CE)

| Entry | ZrCl <sub>4</sub> <sup>2</sup> | Ligand <sup>2</sup> | DMF [mL] | Acetic acid [mL] | T [°C] | Time [min] | Product                              |
|-------|--------------------------------|---------------------|----------|------------------|--------|------------|--------------------------------------|
| 1     | 0.25                           | 0.5                 | 2.5      | 0.04             | 220    | 12         | UiO-66-NH <sub>2</sub> <sup>a3</sup> |
| 2     | 0.25                           | 0.5                 | 2.5      | 0.16             | 220    | 12         | UiO-66-NH <sub>2</sub> <sup>a</sup>  |
| 3     | 0.25                           | 0.5                 | 2.5      | 0.54             | 220    | 12         | UiO-66-NH <sub>2</sub> <sup>a</sup>  |
| 4     | 0.25                           | 0.5                 | 2.5      | 0.54             | 220    | 24         | UiO-66-NH <sub>2</sub> <sup>a</sup>  |

<sup>a</sup> MIL-140A-NH<sub>2</sub> was not attainable using the conventional electric heating method. The amino-tagged framework UiO-66-NH<sub>2</sub> was the only product obtained from each of the four attempted syntheses.<sup>3</sup>

### Characterisation

**Powder X-ray diffraction (PXRD).** PXRD measurements were performed on a PANalytical X'pert Pro diffractometer fitted with a solid-state PIXcel detector (40 kV, 30 mA, 1° divergence and anti-scatter slits, and 0.3 mm receiver and detector slits) using Cu-K $\alpha$  ( $\lambda = 1.5406 \text{ \AA}$ ) radiation.

**Gas Sorption.** N<sub>2</sub> sorption isotherms were measured on an Accelerated Surface Area & Porosimetry System, ASAP 2020 (Micromeritics Instruments Inc.). Prior to analysis, the materials were solvent exchanged with methanol using a Soxhlet washing procedure for 12 h. Approximately 100 mg of the powdered solid was loaded into a glass analysis tube and outgassed for 12 h under vacuum at 120 °C. N<sub>2</sub> adsorption and desorption isotherms were measured at 77 K and data was analysed using Brunauer-Emmett-Teller (BET) analysis models to determine the surface area.

**Scanning Electron Microscopy (SEM).** Field-emission SEM (FE-SEM) images were obtained using a Zeiss ULTRA plus microscope (working distance 9 mm; acceleration voltage 15 kV). Samples were prepared

by dispersing the powdered solids in ethanol to produce a suspension that was deposited onto a carbon block and dried in air.

**Thermogravimetric Analysis (TGA).** TGA measurements were carried out on a TA Instruments Hi-Res TGA 2950 Thermogravimetric Analyser. Approximately 5 mg of sample was placed on a platinum pan which was heated under a flow of N<sub>2</sub> at a rate of 1.5 °C.min<sup>-1</sup> up to 800 °C.

**Elemental analyses.** Elemental analyses were performed at the Chemical Analysis Facility, Macquarie University, Sydney, Australia.

## RESULTS

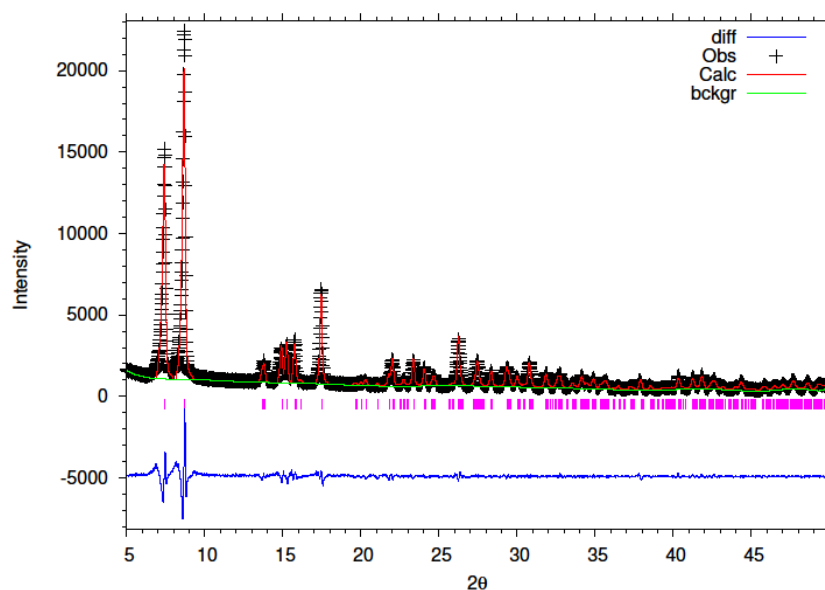

**Fig. S1** Le Bail refinement of MIL-140A-MW showing the experimental (black), refined (red), and difference (blue) patterns. The positions of the Bragg peaks are indicated by the pink bars.

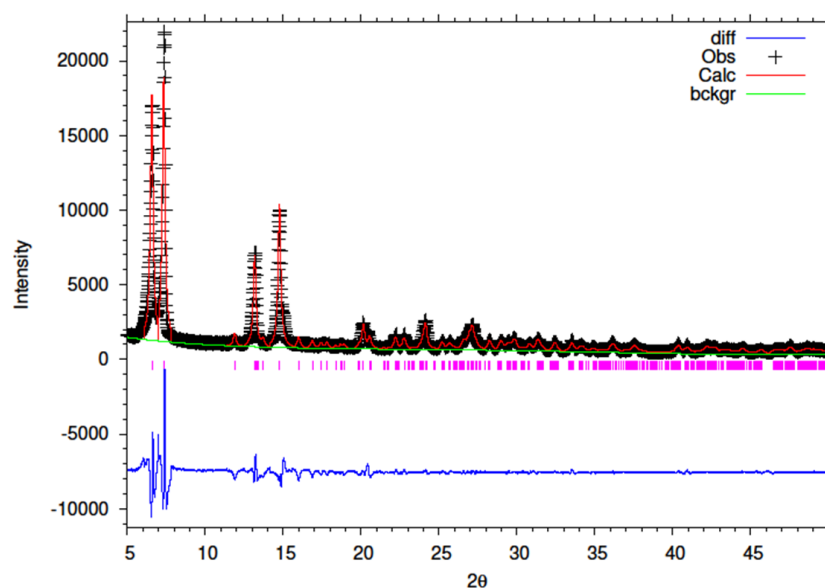

**Fig. S2** Le Bail refinement of MIL-140B-MW showing the experimental (black), refined (red), and difference (blue) patterns. The positions of the Bragg peaks are indicated by the pink bars.

**Table S3** Experimental and simulated Le Bail cell parameters for MIL-140A-MW and MIL-140B-MW

| Phase                   | Space group | a (Å)     | b (Å)     | c (Å)    | $\beta$ (Å) | V (Å <sup>3</sup> ) |
|-------------------------|-------------|-----------|-----------|----------|-------------|---------------------|
| MIL-140A <sub>sim</sub> | C2/c        | 24.53     | 11.24     | 7.87     | 97.71       | 2150.4              |
| MIL-140A-MW             | C2/c        | 24.420(1) | 11.211(1) | 7.836(1) | 103.98(1)   | 2081.7(1)           |
| MIL-140B <sub>sim</sub> | C c         | 27.65     | 13.41     | 7.85     | 90.13       | 2909.9              |
| MIL-140B-MW             | C c         | 26.865(1) | 13.424(1) | 7.820(1) | 93.669(1)   | 2814.7(1)           |

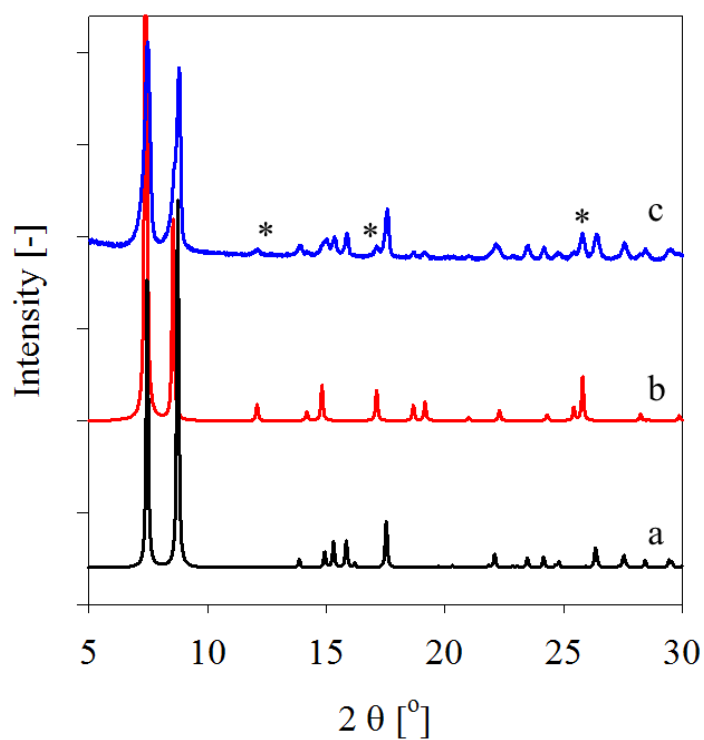

**Fig. S3** Simulated PXRD patterns for (a) MIL-140A and (b) UiO-66; Experimental PXRD patterns for (c) MIL-140A-CE (target temperature: 220 °C, hold-time: 16 h, peaks marked with an asterisk indicate the UiO-66 impurity).

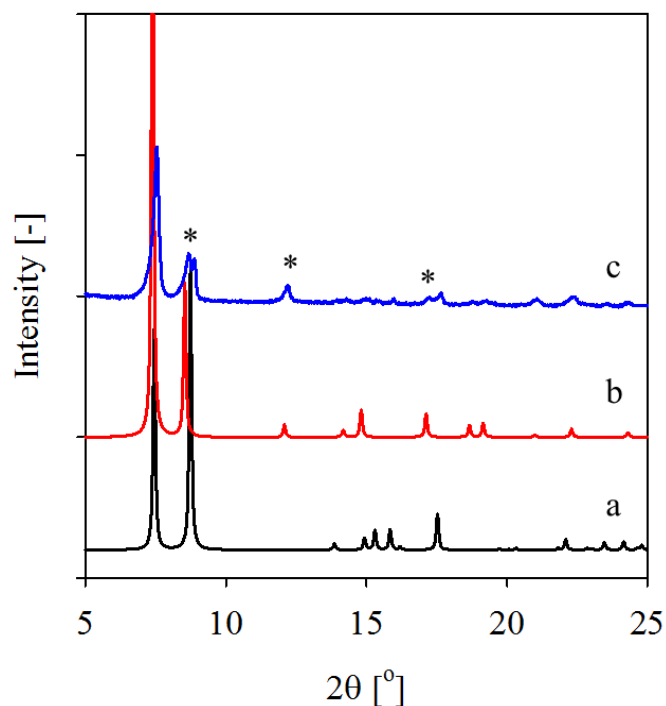

**Fig. S4** Simulated PXRD patterns for (a) MIL-140A and (b) UiO-66; Experimental PXRD patterns for MIL-140A-CEa (target temperature: 220 °C, hold-time: 18 h). Peaks marked with an asterisk indicate the UiO-66 impurity which is maintained, despite the increased reaction time compared with the data presented in Fig. S3.

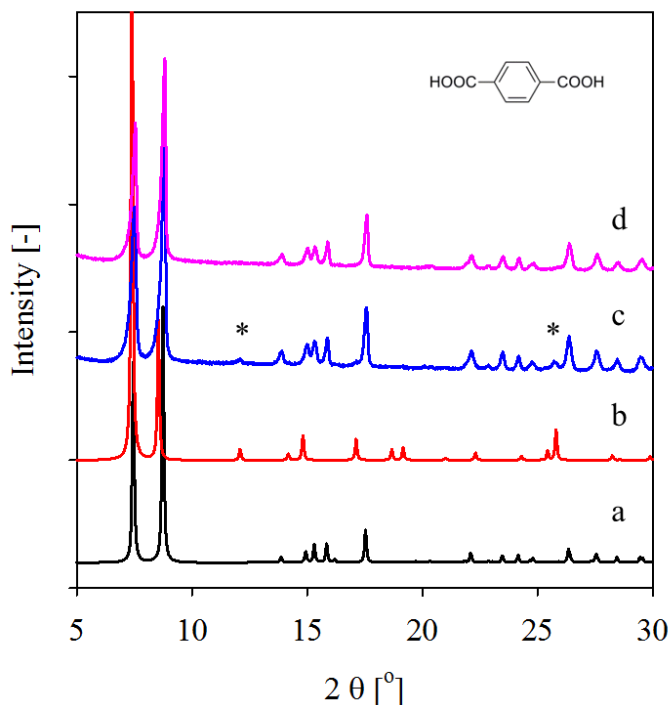

**Fig. S5** Simulated PXRD patterns for (a) MIL-140A, (b) UiO-66, (c) MIL-140A-MW synthesized with a slow ramp rate (1 h to 220 °C and 15 min hold-time) in the microwave oven (peaks marked with an asterisk indicate the UiO-66 impurity) and (d) phase pure MIL-140A-MW synthesized with a fast ramp rate (2 min to 220 °C and 15 min hold-time) in the microwave oven.

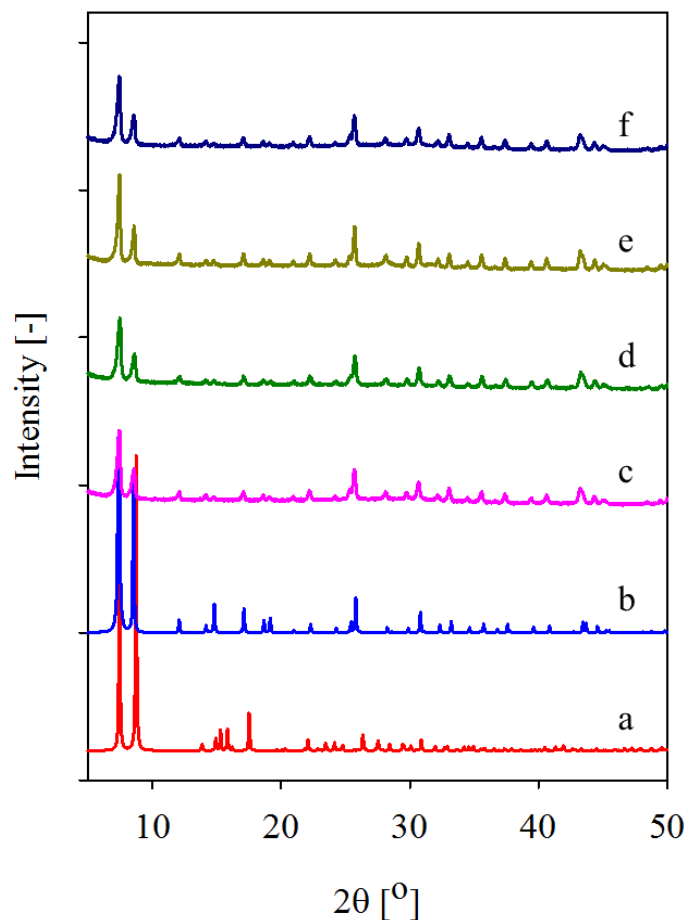

**Fig. S6** Simulated PXRD patterns for (a) MIL-140A and (b) UiO-66. Experimental PXRD patterns for the products obtained from the attempted synthesis of MIL-140A-NH<sub>2</sub> using CE heating (different acetic acid dosage and reaction time): (a) 0.04 mL acetic acid and 12 h at 220 °C, (b) 0.16 mL acetic acid and 12 h at 220 °C, (c) 0.54 mL acetic acid and 12 h at 220 °C and (d) 0.54 mL acetic acid and 24 h at 220 °C. In each case, the product was identifiable as the UiO-66 phase.

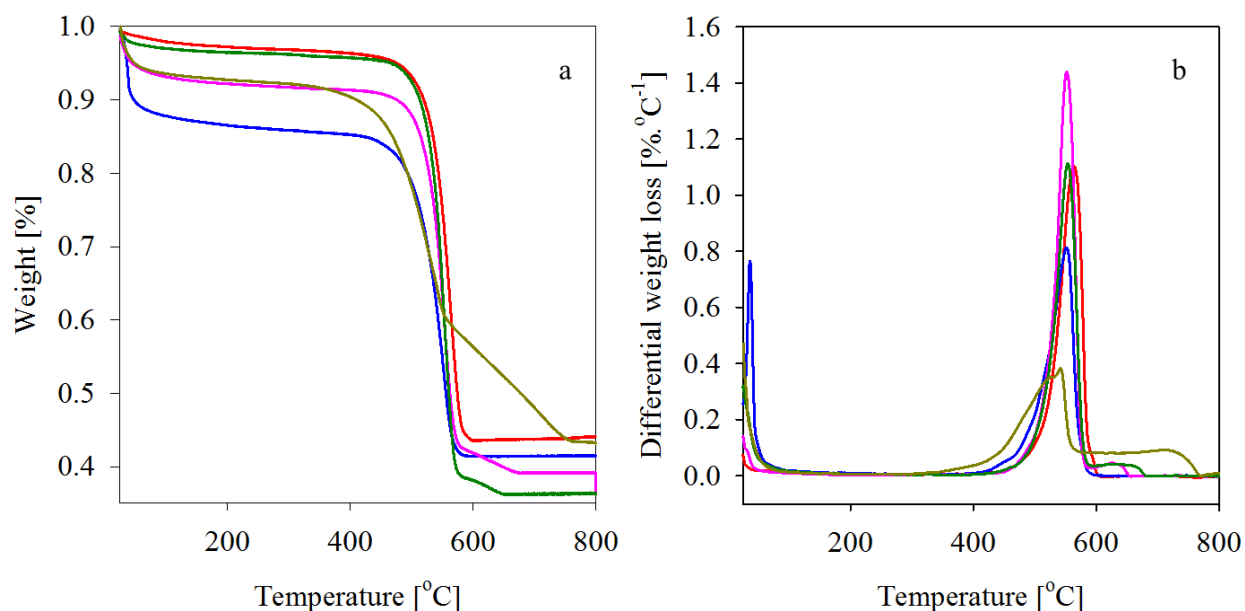

— MIL-140A-MW — MIL-140A-CE — MIL-140B-MW — MIL-140B-CE — MIL-140A-NH<sub>2</sub>-MW

**Fig. S7** Thermogravimetric analysis (N<sub>2</sub> environment) showing the weight loss (a) and differential weight loss (b) for MIL-140A-MW, MIL-140A-CE, MIL-140B-MW, MIL-140B-CE and MIL-140A-NH<sub>2</sub>-MW after solvent exchange with methanol as described in the experimental section.

**Table S4** Comparison of experimental and theoretical weight losses for the series of frameworks.

| Phase                        | Theoretical Weight loss [%] <sup>a</sup> | Experimental Weight loss [%] | Reported Weight loss [%] <sup>1</sup> | Decomposition Temperature [°] |
|------------------------------|------------------------------------------|------------------------------|---------------------------------------|-------------------------------|
| MIL-140A-MW                  | 54.5                                     | 55.8                         | -                                     | 563.9                         |
| MIL-140A-CE                  | 54.5                                     | 53.0                         | 51.3                                  | 551.9                         |
| MIL-140B-MW                  | 61.6                                     | 60.1                         | -                                     | 551.9                         |
| MIL-140B-CE                  | 61.6                                     | 57.9                         | 58.6                                  | 554.0                         |
| MIL-140A-NH <sub>2</sub> -MW | 56.9                                     | 55.7                         | -                                     | 541.6                         |

<sup>a</sup> calculated from the formula for the framework.

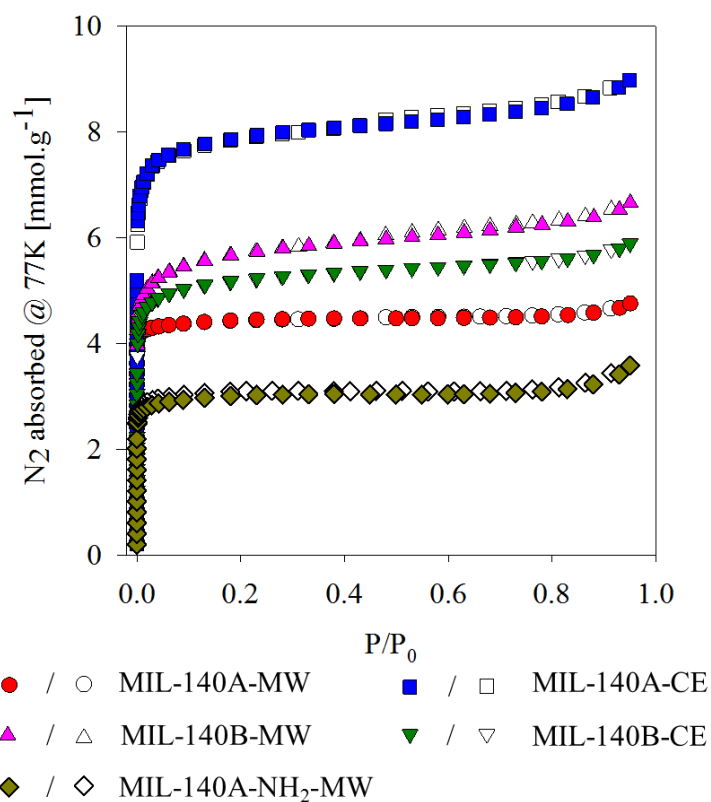

**Fig. S8** N<sub>2</sub> adsorption (filled symbols) and desorption (open symbols) isotherms for MIL-140A-MW, MIL-140A-CE, MIL-140B-MW, MIL-140B-CE and MIL-140A-NH<sub>2</sub>-MW at 77 K (P<sub>0</sub> = 1 atm., the activation procedure is described in the experimental section).

## REFERENCES

1. V. Guillerm, F. Ragon, M. Dan-Hardi, T. Devic, M. Vishnuvarthan, B. Campo, A. Vimont, G. Clet, Q. Yang, G. Maurin, G. Ferey, A. Vittadini, S. Gross and C. Serre, *Angew. Chem. Int. Ed. Engl.*, 2012, **51**, 9188.
2. S. Luukkanen, M. Haukka, E. Eskelinen, T. A. Pakkanen, V. Lehtovuori, J. Kallioinen, P. Myllyperkiö and J. Korppi-Tommola, *Phys. Chem. Chem. Phys.*, 2001, **3**, 1992-1998.
3. M. Kandiah, M. H. Nilsen, S. Usseglio, S. Jakobsen, U. Olsbye, M. Tilset, C. Larabi, E. A. Quadrelli, F. Bonino and K. P. Lillerud, *Chem. Mater.*, 2010, **22**, 6632-6640.
